# Supplementary material
Source: PubMed Central journal article supplement (PMC4987189)

**Supplemental Figure S9**

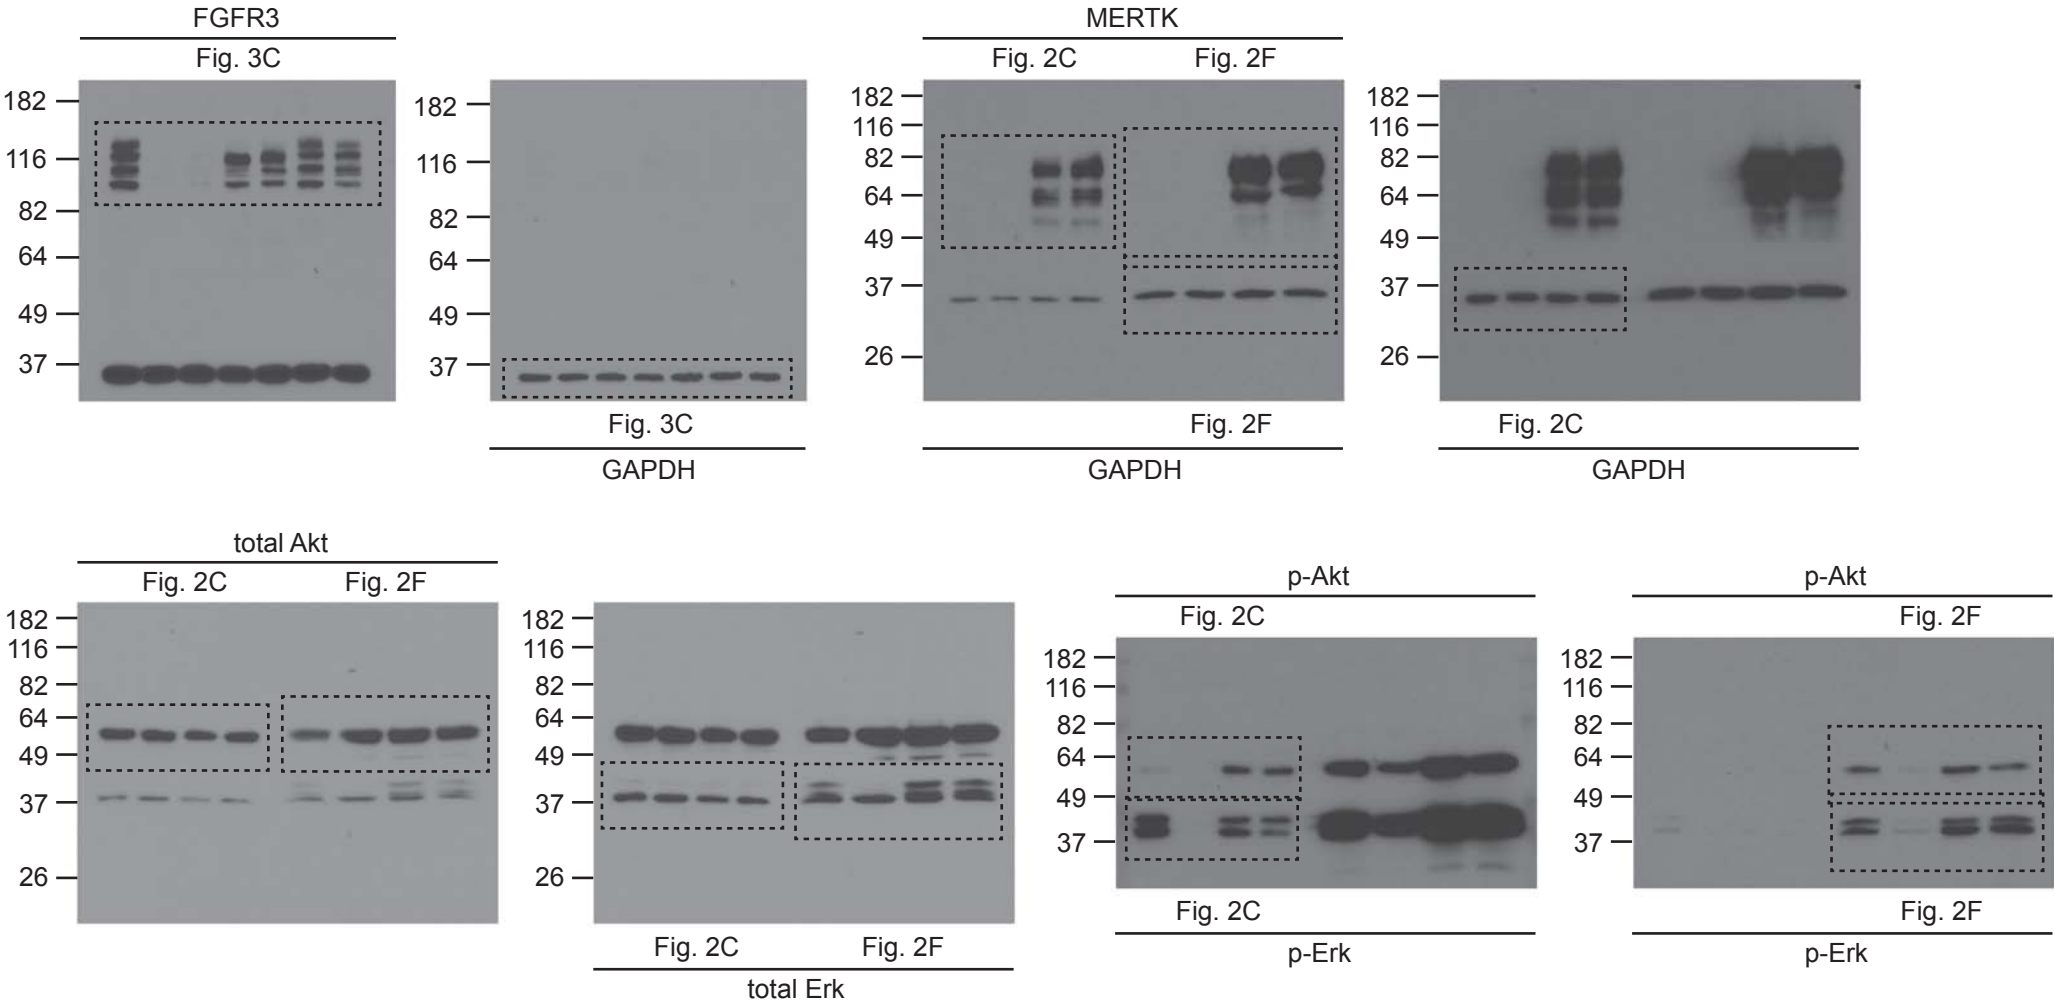

Supplement: NIHMS792009-supplement-10.pdf [file NIHMS792009-supplement-10.pdf]
